# Supplementary material for: Spatial relationships between above-ground biomass and bird species biodiversity in Palawan, Philippines
Source: PLOS journal article supplement (doi:10.1371/journal.pone.0186742), 2017-12-04
Supplement: S5 (10.1371/journal.pone.0186742.s005) [file journal.pone.0186742.s005]

*Supporting Information for*  
*Spatial relationships between above-ground biomass and bird species biodiversity in Palawan, Philippines*

**S2 Table:** Performance of Landsat texture derived AGB models

| <b>Model</b>                   | <b>r</b> | <b>RMSE (Mg/ha)</b> | <b>MAE (Mg/ha)</b> | <b>%Bias</b> |
|--------------------------------|----------|---------------------|--------------------|--------------|
| <b>Correlation of Band 3</b>   | 0.47     | 59.51               | 42.90              | – 0.30       |
| <b>Homogeneity of Band 4</b>   | 0.85     | 40.32               | 29.45              | – 0.30       |
| <b>Second moment of Band 4</b> | 0.77     | 43.55               | 32.33              | – 0.30       |
| <b>Contrast of Band 5</b>      | 0.88     | 25.88               | 36.70              | 1.70         |
| <b>All predictors combined</b> | 0.90     | 35.86               | 27.13              | – 1.00       |
